# Supplementary material for: Patterns of Pretreatment Diagnostic Assessment in Patients Treated with Stereotactic Body Radiation Therapy (SBRT) for Non-Small Cell Lung Cancer (NSCLC): Special Characteristics in the COVID Pandemic and Influence on Outcomes
Source: MDPI journal article supplement (doi:10.3390/curroncol29020092), 2022-02-13
Supplement: s1 [file s1]

**Table S2.** Comparison of pretreatment assessment between patients treated in the pre-COVID (Coronavirus Disease) era (here, defined from 2018-2019) and in the COVID era. The times for the parameters were calculated to the first day of SBRT (stereotactic body radiation therapy). <sup>1</sup> Mean (min-max). <sup>2</sup> Median (min-max). <sup>3</sup> Mann-Whitney U test. <sup>4</sup> This information is missing in 2 patients.

| <b>Parameter</b>                                                      | <b>Pre-COVID era<br/>(2018-2019),<br/><i>n</i> = 26 patients</b> | <b>COVID era<br/>(2020-2021),<br/><i>n</i> = 19 patients</b> | <b><i>p</i>-Value</b> |
|-----------------------------------------------------------------------|------------------------------------------------------------------|--------------------------------------------------------------|-----------------------|
| Treated patients per month <sup>1</sup>                               | 1.1<br>(0–4)                                                     | 1.5<br>(0–3)                                                 | 0.25 <sup>3</sup>     |
| Multidisciplinary tumor board decision to SBRT [weeks] <sup>2,4</sup> | 5.0<br>(0–12.7)                                                  | 6.4<br>(2.0–59.7)                                            | 0.26 <sup>3</sup>     |
| Bronchoscopy to SBRT [weeks] <sup>2</sup>                             | 8.0<br>(3.7–19.3)                                                | 9.0<br>(5.9–62.7)                                            | 0.16 <sup>3</sup>     |
| Planning CT to SBRT [weeks] <sup>2</sup>                              | 1.9<br>(1.0–3.0)                                                 | 3.0<br>(1.4–4.9)                                             | <0.001 <sup>3</sup>   |
